# Supplementary material for: Fluorescence quenching-based signal amplification on immunochromatography test strips for dual-mode sensing of two biomarkers of breast cancer
Source: Royal Society of Chemistry journal article supplement (doi:10.1039/c7nr06781j), 2017-01-01
Supplement: c7nr06781j1.pdf [file c7nr06781j1.pdf]

# Fluorescence-quenching Based Signal Amplification on Immunochromatography Test Strip for Dual-Mode Sensing Two Biomarkers of Breast Cancer

*Bo Zhang*<sup>a,§</sup>, *Wenjuan Ma*<sup>b,§</sup>, *Fuxin Li*<sup>c,§</sup>, *Weichen Gao*<sup>a</sup>, *Qian Zhao*<sup>a</sup>, *Weipan Peng*<sup>a</sup>, *Jiafang Piao*<sup>a</sup>, *Xiaoli Wu*<sup>a</sup>, *Hanjie Wang*<sup>a</sup>, *Xiaoqun Gong*<sup>a,\*</sup>, *Jin Chang*<sup>a,\*</sup>

<sup>a</sup> School of Life Sciences, Tianjin University, Tianjin Engineering Center of Micro-Nano Biomaterials and Detection-Treatment Technology, Collaborative Innovation Center of Chemical Science and Engineering (Tianjin), Tianjin 300072, China

<sup>b</sup> Breast Imaging Department, Tianjin Medical University Cancer Institute and Hospital, National Clinical Research Center of Cancer, Key Laboratory of Breast Cancer Prevention and Therapy, Tianjin Medical University, Ministry of Education, Key Laboratory of Cancer Prevention and Therapy, Tianjin, China

<sup>c</sup> Department of General Surgery, Tianjin Medical University General Hospital, Tianjin, China

§ B.Z. and W.M. have equal contribution to this paper.

## Corresponding Author

\*Xiaoqun Gong: Email: [gongxiaoqun@tju.edu.cn](mailto:gongxiaoqun@tju.edu.cn).

\*Jin Chang: Email: [jinchang@tju.edu.cn](mailto:jinchang@tju.edu.cn). Tel: +86-22-27401821

**Table S1. A comparison of the mFICTS and referenced immune assays for tumor markers.**

| Immune assays                | Limits of detection |              | Reference |
|------------------------------|---------------------|--------------|-----------|
|                              | CEA (ng/mL)         | CA153 (U/mL) |           |
| Chemiluminescent immuneassay | 0.65                | 0.8          | [1]       |
| Electrochemical immuneassay  | —                   | 0.3          | [2]       |
| Immunochemistry test strip   | 2                   | —            | [3]       |
| Immunochemistry test strip   | 0.35                | —            | [4]       |
| Immunochemistry test strip   | 0.06                | 0.09         | This work |

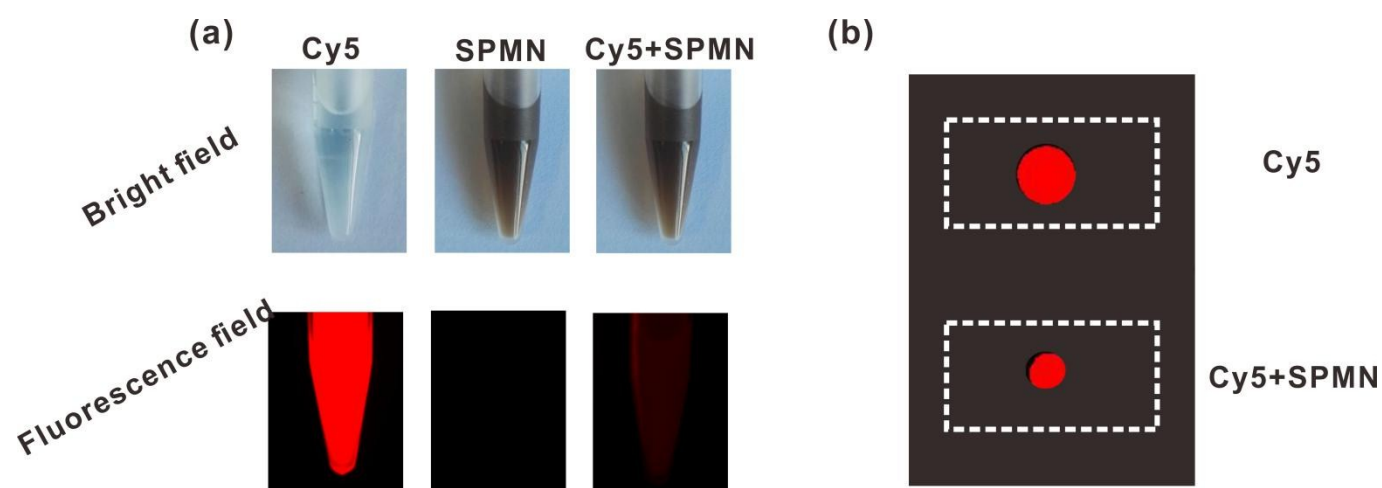

**Figure S1.** (a) Bright-field and fluorescence-field images of solutions containing Cy5; SPMN; and Cy5 with SPMN. (b) Fluorescence images of solutions containing Cy5 and Cy5 with SPMN on the nitrocellulose membrane.

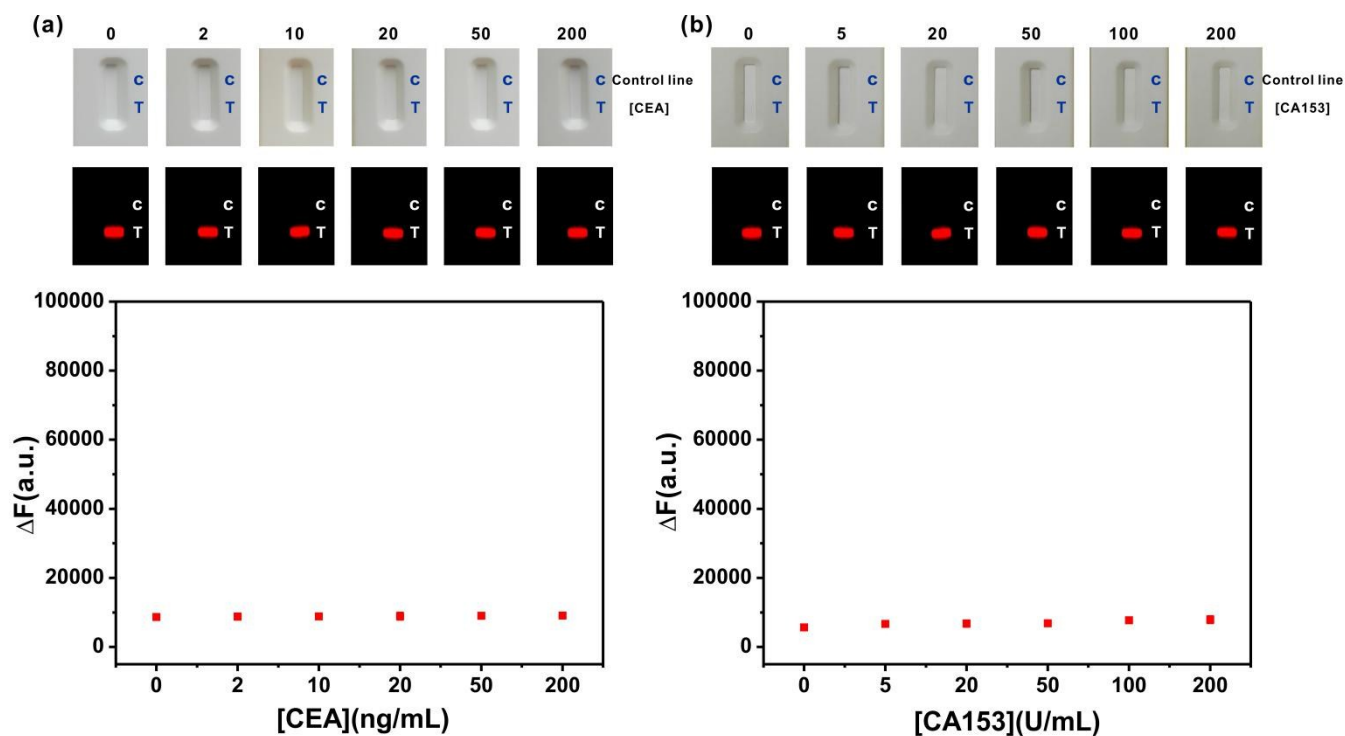

**Figure S2.** (a) Bright-field, fluorescence-field images and the fluorescent intensity change value of solutions without or with different concentrations of CEA antigen; (b) Bright-field, fluorescence-field images and the fluorescent intensity change value of solutions without or with different concentrations of CA153 antigen.

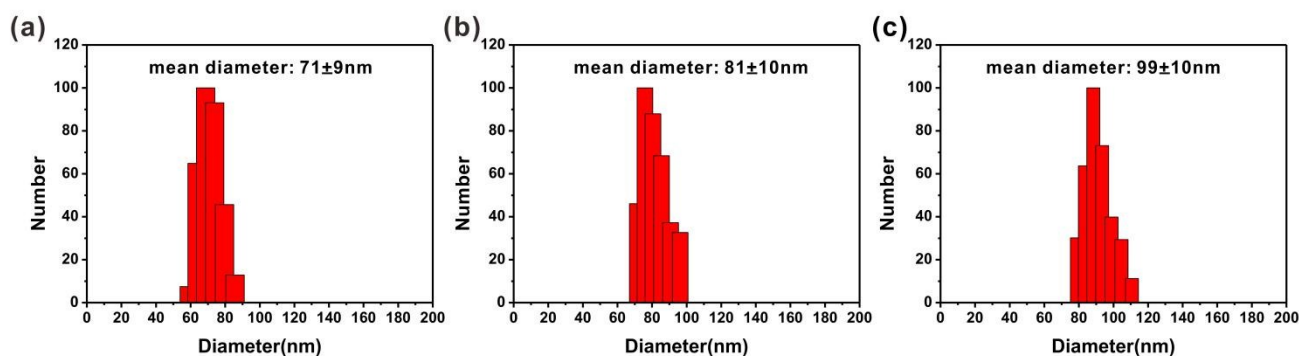

**Figure S3.** Size distribution of SPMN with different  $\text{Fe}_3\text{O}_4$  MNPs content. (a) The  $\text{Fe}_3\text{O}_4$  MNPs in one

SPMN with the concentration 3.6 mg/mL, (b) 6.0 mg/mL, (c) 8.4 mg/mL.

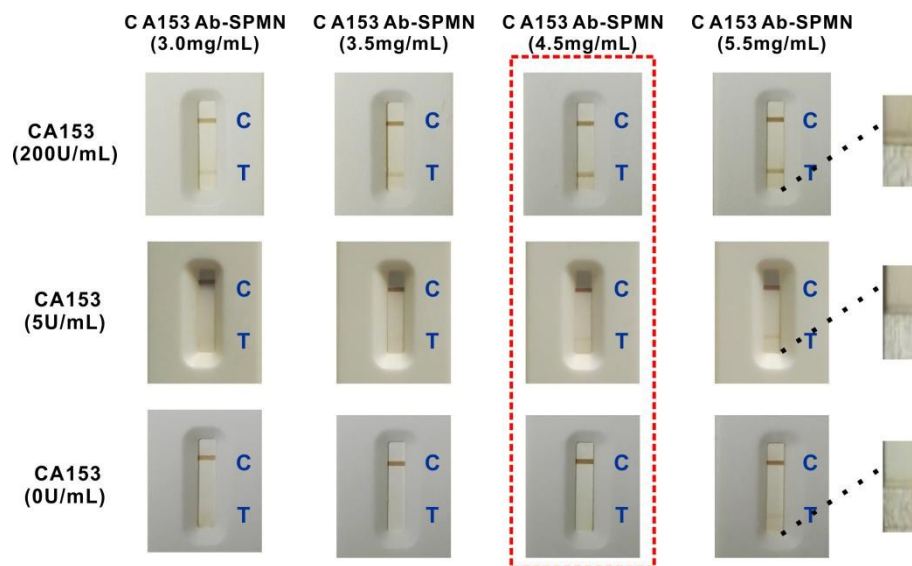

**Figure S4.** Colorimetric signal intensity under different concentrations of CA153 Ab-SPMN. The concentration of CA153 antigen were 0 U/mL, 5 U/mL and 200 U/mL respectively.

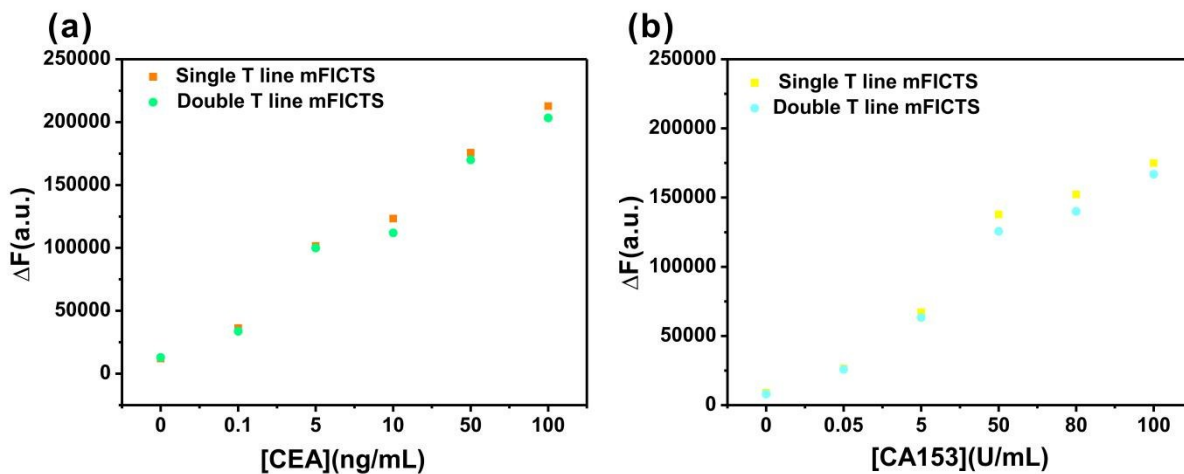

**Figure S5.** (a) The numerical simulation of single test line mFICTS and double test lines mFICTS for CEA. (b) The numerical simulation of single test line mFICTS and double test lines mFICTS for CA153.

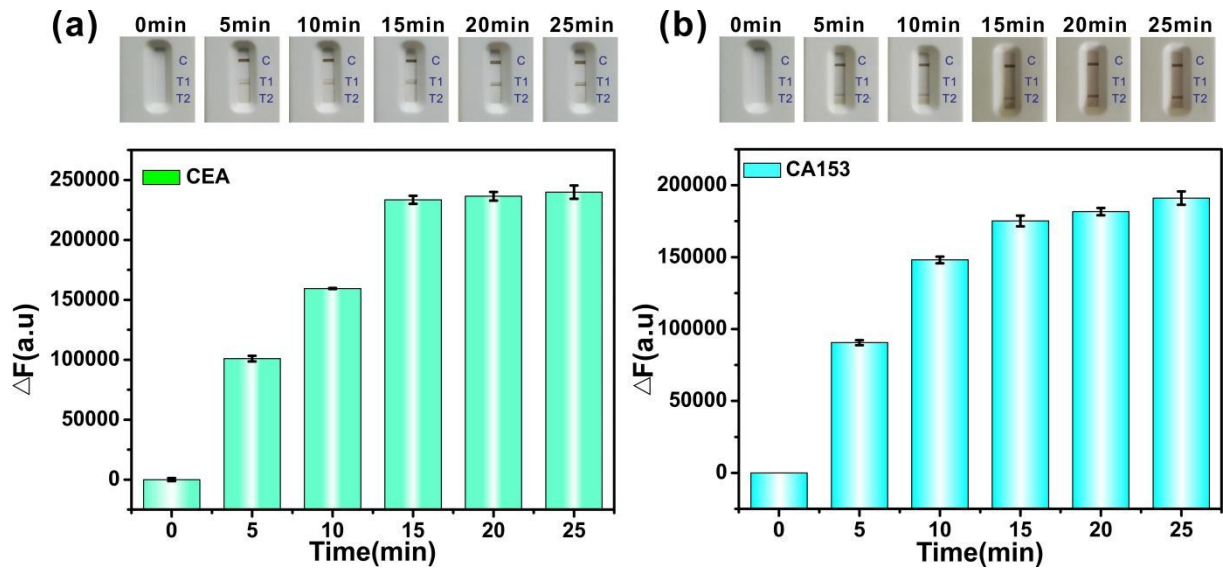

**Figure S6.** The effect test time of mFICTS. (a), (b) Qualitative detection time for CEA and CA153. The concentration of CEA antigen was 100 ng/mL and CA153 antigen was 100 U/mL.

**Table S2. Clinical data analysis of patient serum by using the mFICTS.**

|                 | Sample size | Error Number | Error Rate |                 | Sample size | Error Number | Error Rate |
|-----------------|-------------|--------------|------------|-----------------|-------------|--------------|------------|
| CA153           |             |              |            | CEA             |             |              |            |
| Positive Sample | 32          | 2            | 6.25%      | Positive Sample | 20          | 1            | 5%         |
| CA153           |             |              |            | CEA             |             |              |            |
| Negative Sample | 18          | 1            | 5.57%      | Negative Sample | 30          | 2            | 6.67%      |
| In All          | 50          | 3            | 6%         | In All          | 50          | 3            | 6%         |

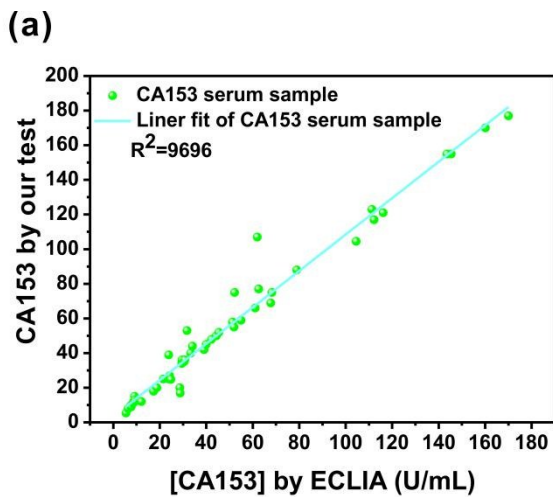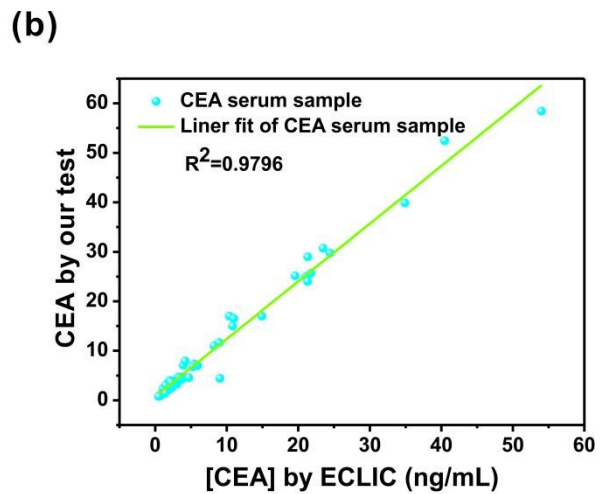

**Figure S7.** Linear fitting method for our test results and ECLIA detection results. (a) Linear fitting for CA153. (b) Linear fitting for CEA.

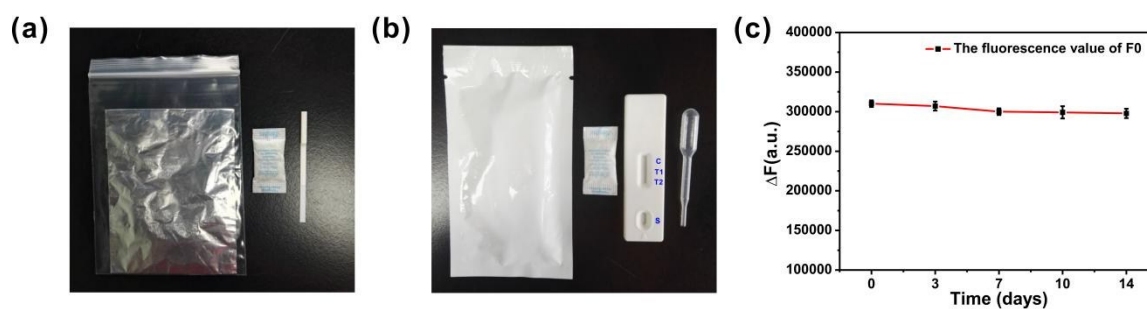

**Figure S8.** (a) The test strip which was cut into 3 mm preserved in the silver paper. (b) The sealed package of mFICTS. (c) Three repeat tests for the fluorescence intensity F0 before reaction at 0, 3, 7, 10, 14 days.

## Rererence

- [1] Z. Fu, Z. Yang, J. Tang, H. Liu, F. Yan and H. Ju, *ANAL CHEM*, 2007, **79**, 7376-7382.
- [2] G. Wang, Y. Qing, J. Shan, F. Jin, R. Yuan and D. Wang, *MICROCHIM ACTA*, 2013, **180**, 651-657.
- [3] C. Wang, F. Hou and Y. Ma, *BIOSENS BIOELECTRON*, 2015, **68**, 156-162.
- [4] Z. Chen, R. Liang, X. Guo, J. Liang, Q. Deng, M. Li, T. An, T. Liu and Y. Wu, *BIOSENS BIOELECTRON*, 2017, **91**, 60-65.

**Calculate the number of oil-soluble Fe<sub>3</sub>O<sub>4</sub> NPs in one PLGA-Modified water-soluble super-paramagnetic nanosphere (SPMN).**

$$Np = n_c V_1 / V_2 \quad \text{Eqn.1}$$

$Np$  is the number of Fe in one Fe<sub>3</sub>O<sub>4</sub> NPs,  $n_c$  is the number of Fe atom in one Fe<sub>3</sub>O<sub>4</sub> cell;  $V_1$  is the volume of Fe<sub>3</sub>O<sub>4</sub> NPs;  $V_2$  is the volume of Fe<sub>3</sub>O<sub>4</sub> cell.

$$C_1 = N_A C_{Fe} / (Np M_{Fe}) \quad \text{Eqn.2}$$

$C_1$  is the particle concentration of Fe<sub>3</sub>O<sub>4</sub> NPs;  $N_A$  is the Avogadro Constant;  $C_{Fe}$  ( $\mu$  g/L) is the mass concentration of Fe atom which measured by the ICP-MS;  $M_{Fe}$  is the relative atomic mass of Fe atom.

$$C_2 = C_m / [4/3 \pi (d/2)^3 \rho] \quad \text{Eqn.3}$$

$C_2$  is the particle concentration of PMAO-Modified water-soluble super-paramagnetic nanosphere (SPMN);  $C_m$  is the mass concentration of SPMN,  $\rho$  is the density of the SPMN.

$$N = C_1 / C_2 \quad \text{Eqn.4}$$

$N$  is the number of oil-soluble Fe<sub>3</sub>O<sub>4</sub> NPs in one PMAO-Modified water-soluble super-paramagnetic nanosphere (SPMN)

**The quenching efficiency of the SPMN to the Cy5 molecules**

$$n_{Cy5} = c(Ab) * V(Ab) * R_{Cy5/Ab} / M(Ab) \quad \text{Eqn.5}$$

$n_{Cy5}$  is the molar mass of Cy5;  $c(Ab)$  is the particle concentration of the capture antibody;  $V(Ab)$  is the reactive volume of capture antibody;  $R_{Cy5/Ab}$  is the ratio of the Cy5 number with an antibody;  $M(Ab)$  is the relative molecular mass of the antibody.

$$N_{quench} = n_{Cy5} * (F_0 - F) / (n_{SPMN} * F_0) \quad \text{Eqn.6}$$

$N_{quench}$  is the quenching capacity about one SPMN relative to Cy5 molecules.  $n_{SPMN}$  is the reactive molar mass of SPMN;  $F_0$  is the fluorescence intensity before reaction;  $F$  is the fluorescence intensity after reaction.
